# Supplementary material for: Communication Efficiency and Congestion of Signal Traffic in Large-Scale Brain Networks
Source: PLOS journal article supplement (doi:10.1371/journal.pcbi.1003427), 2014-01-09
Supplement: S9 (10.1371/journal.pcbi.1003427.s009) [file journal.pcbi.1003427.s009]

| intensity | C vs R                                   | C vs L                                     | R vs L                                     |
|-----------|------------------------------------------|--------------------------------------------|--------------------------------------------|
| 0.005     | $t = -3.14,$<br>$p = 2.2 \times 10^{-3}$ | $t = -10.05,$<br>$p = 8.5 \times 10^{-17}$ | $t = -9.16$<br>$p = 3.8 \times 10^{-15}$   |
| 0.010     | $t = -4.28,$<br>$p = 4.3 \times 10^{-5}$ | $t = -16.36,$<br>$p = 6.8 \times 10^{-30}$ | $t = -26.18,$<br>$p = 2.7 \times 10^{-46}$ |
| 0.015     | $t = -3.76,$<br>$p = 2.9 \times 10^{-4}$ | $t = -11.16,$<br>$p = 3.3 \times 10^{-19}$ | $t = -14.33,$<br>$p = 7.0 \times 10^{-26}$ |
| 0.020     | $t = -2.96,$<br>$p = 3.9 \times 10^{-3}$ | $t = -23.37,$<br>$p = 4.4 \times 10^{-42}$ | $t = -17.51,$<br>$p = 4.5 \times 10^{-32}$ |
